# Supplementary figures and images for: Live imaging of theDictyosteliumcell cycle reveals widespread S phase during development, a G2 bias in spore differentiation and a premitotic checkpoint
Source: Oxford University Press journal article supplement (doi:10.1242/dev.020115), 2008-03-27

**(A)**

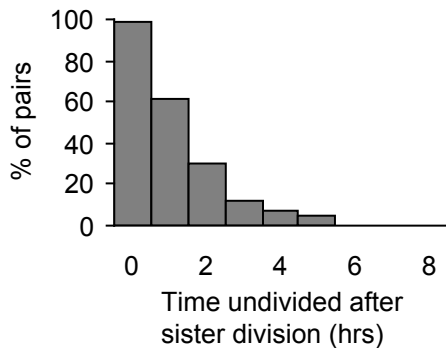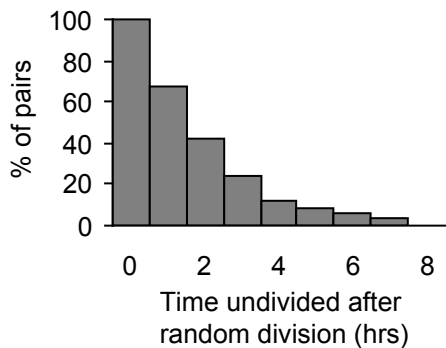

**(B)**

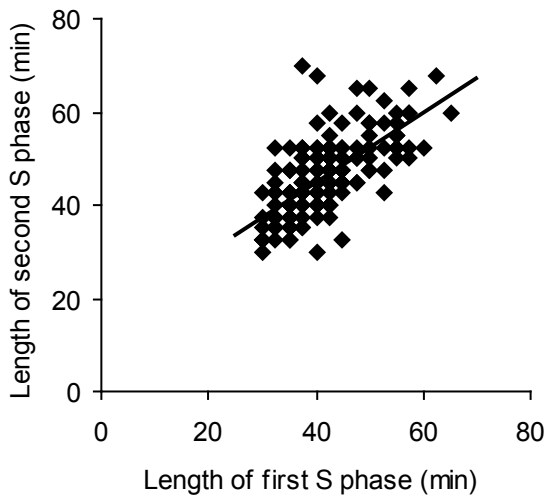

Supplement: dev020115-sup-020115-figs1.pdf [file dev020115-sup-020115-figs1.pdf]

HP1

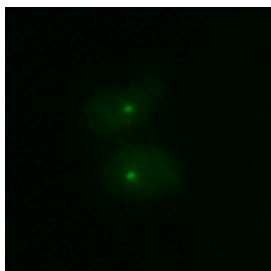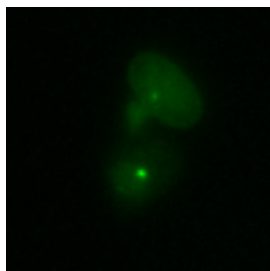

DAPI

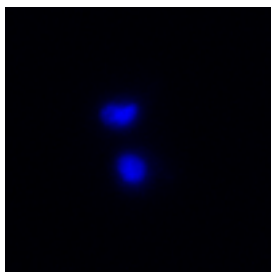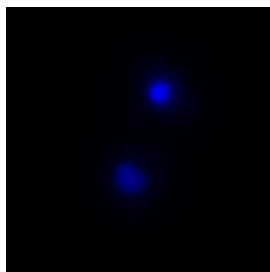

merge

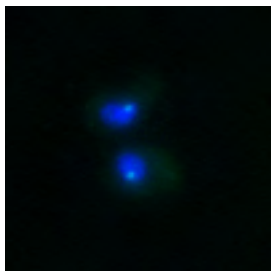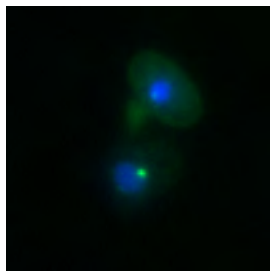

Supplement: dev020115-sup-020115-figs2.pdf [file dev020115-sup-020115-figs2.pdf]

**(A)**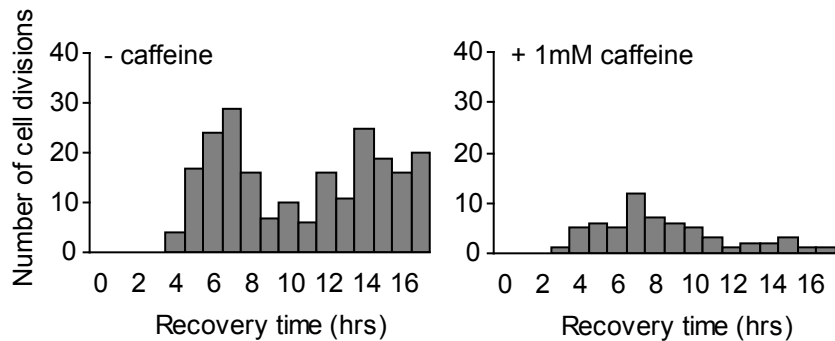**(B)**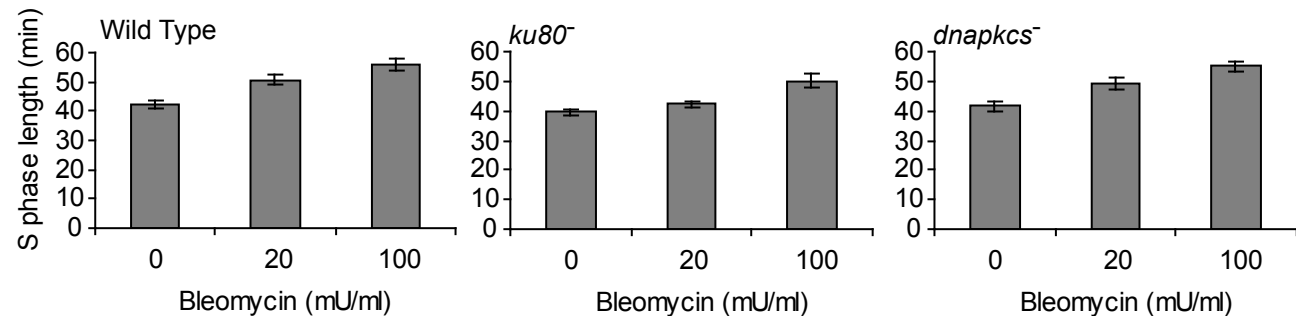

Supplement: dev020115-sup-020115-figs3.pdf [file dev020115-sup-020115-figs3.pdf]
